# Supplementary material for: One-pot synthesis of carbon dots from neem resin and the selective detection of Fe(ii) ions and photocatalytic degradation of toxic dyes
Source: Royal Society of Chemistry journal article supplement (doi:10.1039/d3su00404j), 2024-01-01
Supplement: d3su00404j4.pdf [file d3su00404j4.pdf]

## **One-pot synthesis of carbon dots from neem resin and their selective detection of Fe(II) ions and photocatalytic degradation of toxic dyes**

**S. Gokul Eswaran<sup>1,2</sup>, T. Stalin<sup>3</sup>, D. Thiruppathi<sup>4</sup>, Manivannan Madhu<sup>1</sup>,  
S. Santhoshkumar<sup>1</sup>, Jolanta Warchol<sup>6</sup>, A. Santhana Krishna Kumar\*<sup>1</sup>,  
Wei-Lung Tseng\*<sup>1,5</sup>, N. Vasimalai\*<sup>2</sup>**

<sup>1</sup>Department of Chemistry, National Sun Yat-Sen University, No. 70, Lien-hai Road, Gushan District, Kaohsiung, 80424, Taiwan.

<sup>2</sup>Department of Chemistry, B.S. Abdur Rahman Crescent Institute of Science and Technology, Vandalur, Chennai-600 048, India.

<sup>3</sup>Department of Industrial Chemistry, Alagappa University, Karaikudi - 630 003, Tamil Nadu, India

<sup>4</sup>Department of Chemistry, Vivekananda College, Tiruvedakam West, Madurai, 625 234, India.

<sup>5</sup> School of Pharmacy, Kaohsiung Medical University, No. 100, Shiquan 1<sup>st</sup> Road, Sanmin District, Kaohsiung city 80708, Taiwan.

<sup>6</sup>Department of Advanced Material Technology, Faculty of Chemistry, Wroclaw University of Science and Technology, ul. M. Smoluchowskiego 25, Wroclaw city 50-372, Poland.

### **Contact Correspondence to:**

**\*Professor Wei-Lung Tseng;** E-mail: [tsengwl@mail.nsysu.edu.tw](mailto:tsengwl@mail.nsysu.edu.tw)

Department of Chemistry, National Sun Yat-sen University, Taiwan.

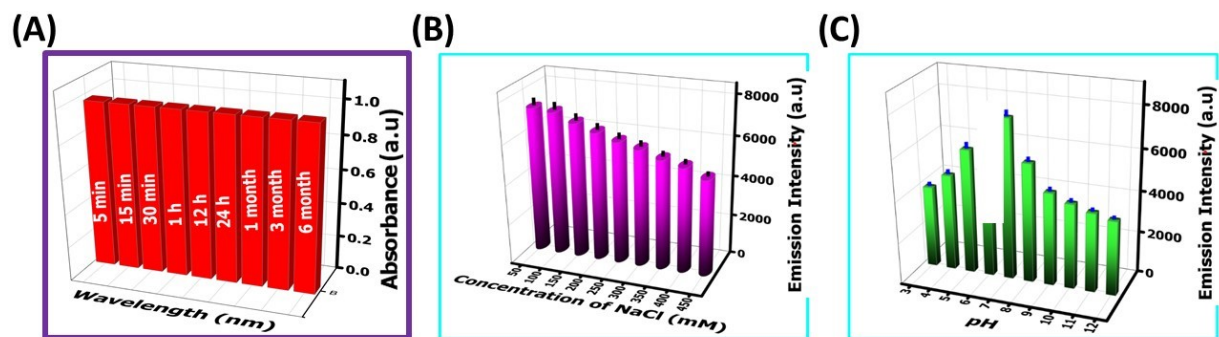

**Figure S1.** (A) the proposed probe of (RCDs) fluorescence intensity for stability studies behavior; (B) Plot of emission intensity against various concentration of NaCl (ionic strength); (C) The pH study against fluorescence emission intensity with different pH.

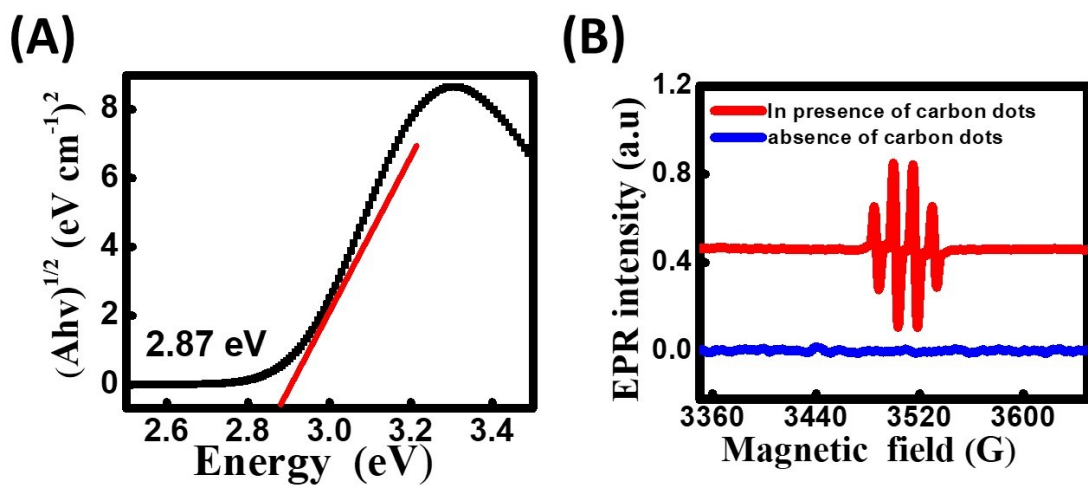

**Figure S2.** UV-Vis DRS spectra for in presence of NR-CDs nano-catalyst **(A)** Tauc plot, **(B)** EPR spectra of irradiation of visible light, a solution containing, in presence of 10 mM of DMPO dissolved in 25% of DMSO in addition with NR-CDs nano-catalyst (curve red line), absence of NR-CDs nano-catalyst (curve blue line).

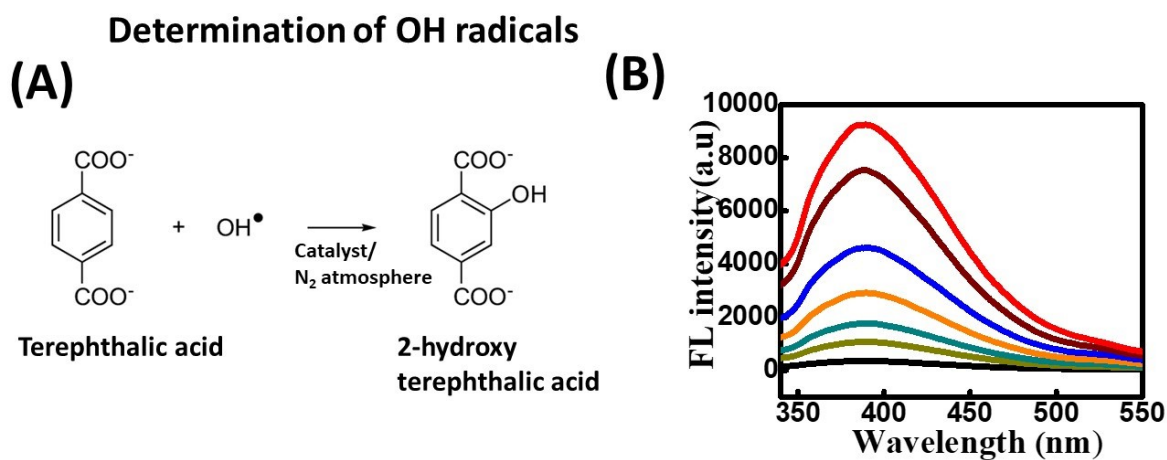

**Figure S3.** Fluorescence spectroscopy monitoring of the oxidation of tere-phthalic acid to 2-hydroxyterephthalic acid in the presence of NR-CDs nano-catalyst. **(A)** Reaction between terephthalic acid and OH<sup>•</sup> radical **(B)** Fluorescence spectroscopy (FL spectra).
