# Supplementary figures and images for: One-pot synthesis of carbon dots from neem resin and the selective detection of Fe(ii) ions and photocatalytic degradation of toxic dyes
Source: Royal Society of Chemistry journal article supplement (doi:10.1039/d3su00404j), 2024-01-01

(A)

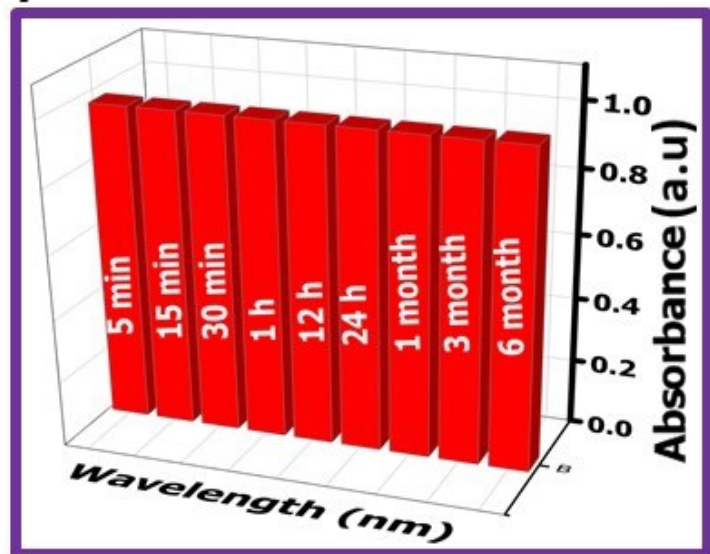

(B)

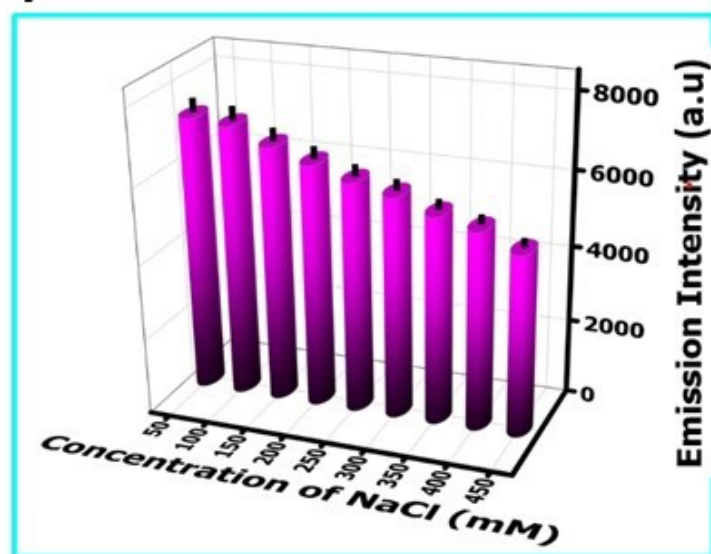

(C)

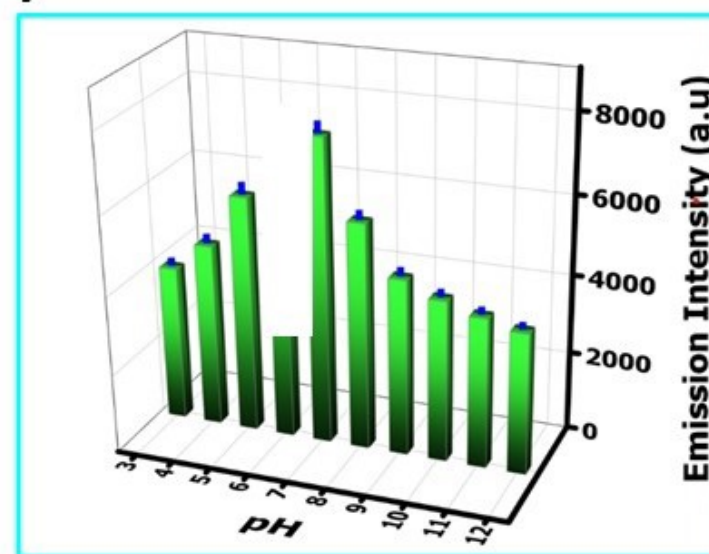

Supplement: d3su00404j1.pdf [file d3su00404j1.pdf]

(A)

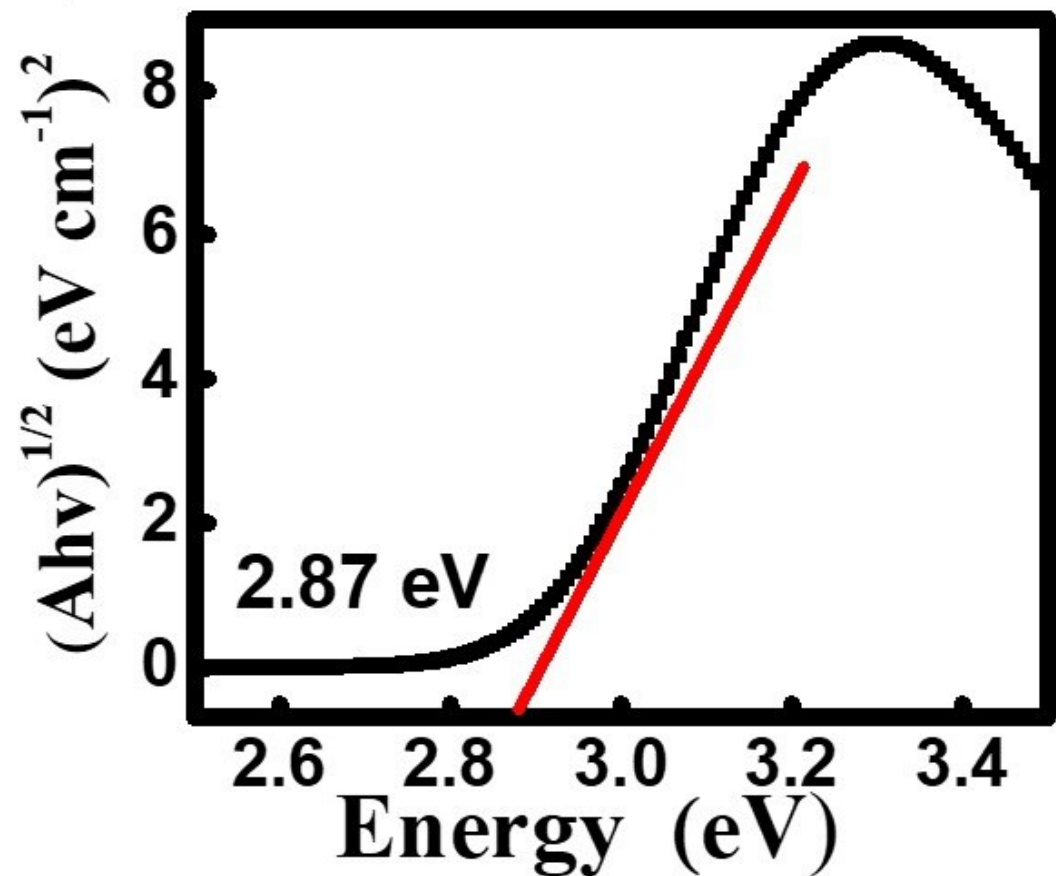

(B)

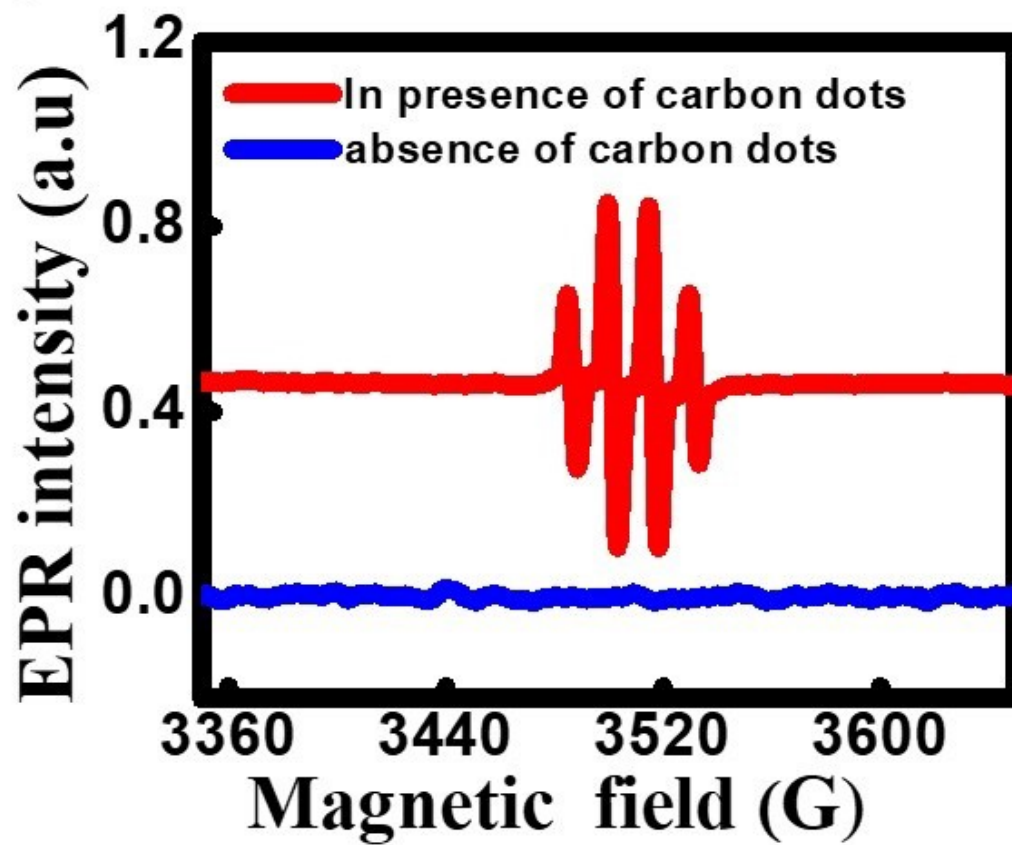

Supplement: d3su00404j2.pdf [file d3su00404j2.pdf]

## Determination of OH radicals

(A)

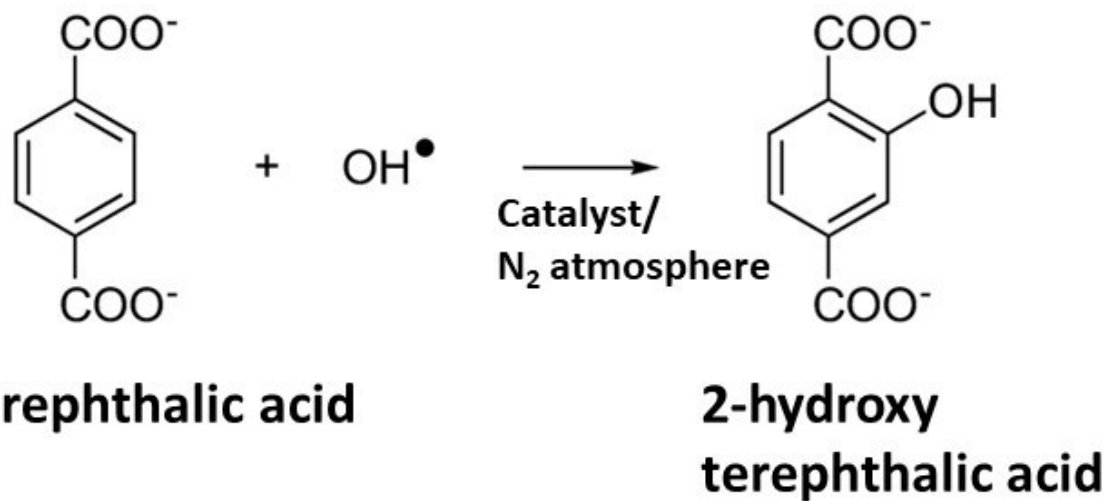

(B)

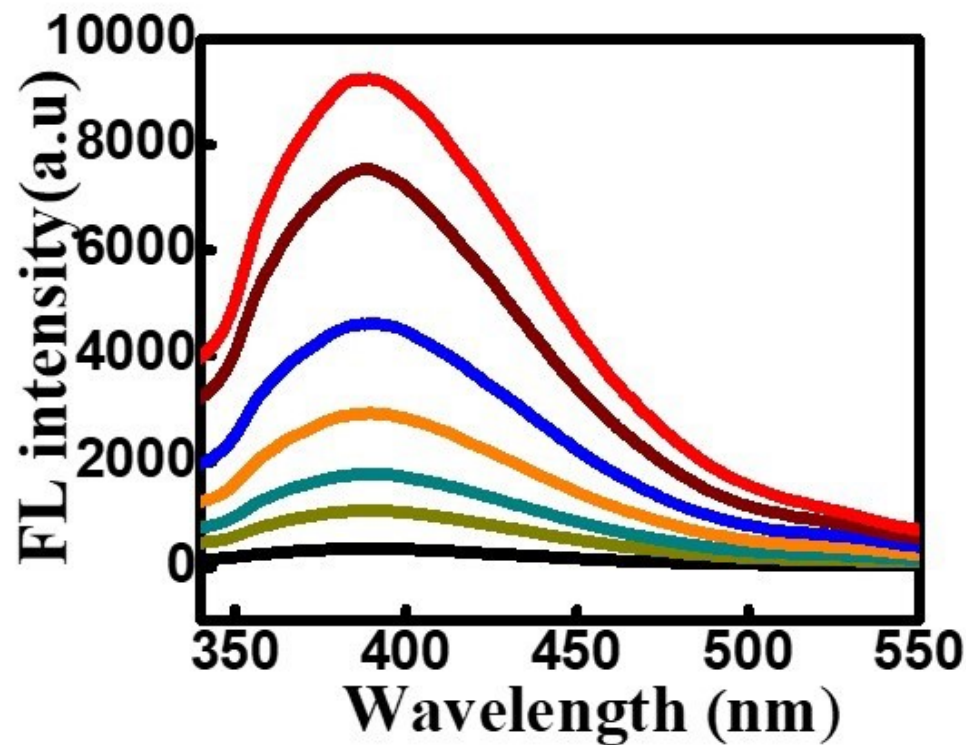

Supplement: d3su00404j3.pdf [file d3su00404j3.pdf]
